# Supplementary material for: Metformin Prevents Cocaine Sensitization: Involvement of AMPK Trafficking between Subcellular Compartments in the Corticostriatal Reward Circuit
Source: Preprints.org preprint supplement (doi:10.20944/preprints202310.1746.v1), 2023-10-26
Supplement: Supplementary file 2 [file supplementary]

## Supplementary Figures and Tables:

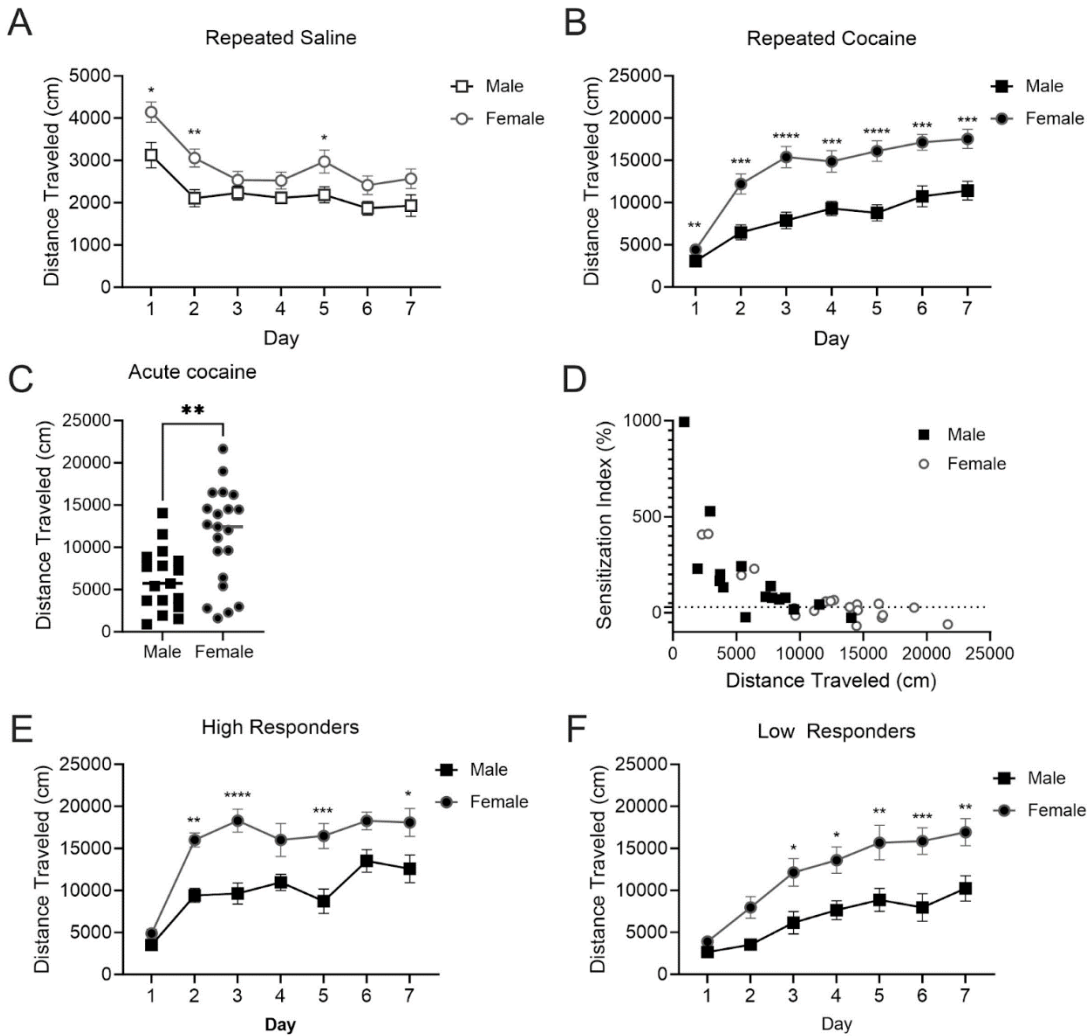

**Figure S1. Sex differences in cocaine locomotor sensitization.** **A)** Distance travelled by all male and female rats exposed to saline as an initial treatment over the course of experiment 1. A two-way ANOVA revealed a main effect of day  $F_{3.57,89.28}=30.48$ ,  $p<0.0001$ , sex  $F_{1,25}=6.255$ ,  $p=0.0193$ , and a sex x day interaction  $F_{6,150}=2.162$ ,  $p=0.0498$ . \* $p<0.05$ , \*\* $p<0.01$ . **B)** Distance travelled by all male and female rats exposed to 15 mg/kg of cocaine as an initial treatment over the course of experiment 1. A main effect of day  $F_{3.64,120.2}=30.95$ ,  $p<0.0001$ , a sex  $F_{1,33}=46.2$ ,  $p<0.0001$ , and a sex x day interaction  $F_{6,198}=2.478$ ,  $p=0.0247$ . \*\*\* $p<0.001$ , \*\*\*\* $p<0.0001$ . **C)** Distance travelled by all male and female rats after acute exposure to 15 mg/kg of cocaine 1. A Mann Whitney Test revealed a significant difference in response to acute cocaine,  $p=0.0048$ . **D)** Relationship between sensitization index and distance travelled by male ( $R^2=0.4615$ ,  $p=0.0038$ ) and female ( $R^2=0.7043$ ,  $p<0.0001$ ) rats after acute exposure to cocaine. **E)** Distance travelled by rats deemed high responders to cocaine over the course of the initial treatment injections. The results of a two-way ANOVA revealed a main effect of day  $F_{6,112}=17.86$ ,  $p<0.0001$ , sex  $F_{1,112}=65.98$ ,  $p<0.0001$ , and a group x day interaction  $F_{18,186}=2.265$ ,  $p=0.0034$ . **F)** Distance travelled by rats deemed low responders to cocaine over the course of the initial treatment injections. A main effect of day  $F_{6,105}=14.45$ ,  $p<0.0001$  and sex  $F_{1,105}=55.88$ ,  $p<0.0001$  were found.

Table S1. Statistical analysis

| Figure number                                      | Test                                                                                                                                                                                  | F-value/U-value                                                                                                                                                                   | P-value                                                                                                                | Partial Eta <sup>2</sup>                                                                             |
|----------------------------------------------------|---------------------------------------------------------------------------------------------------------------------------------------------------------------------------------------|-----------------------------------------------------------------------------------------------------------------------------------------------------------------------------------|------------------------------------------------------------------------------------------------------------------------|------------------------------------------------------------------------------------------------------|
| Figure 3B                                          | Mann-Whitney test, two-tailed                                                                                                                                                         | U=88                                                                                                                                                                              | 0.0343                                                                                                                 |                                                                                                      |
| Figure 3C                                          | Two-way ANOVA<br>Treatment<br>Sex<br>Treatment x Sex                                                                                                                                  | F(1,34) = 14.46<br>F(1,34) = 59.05<br>F(1,34) = 10.14                                                                                                                             | <u>p&lt;0.0001</u><br><u>p=0.0006</u><br><u>p=0.0031</u>                                                               | <u>0.634</u><br><u>0.372</u><br><u>0.230</u>                                                         |
| Figure 3D                                          | RM Two-way ANOVA<br>Treatment<br>Day<br>Treatment x Day                                                                                                                               | F(3,20) = 22.81<br>F(3,274, 74.49) = 9.419<br>F(21,140) = 4.774                                                                                                                   | <u>p&lt;0.0001</u><br><u>p&lt;0.0001</u><br><u>p&lt;0.0001</u>                                                         | <u>0.700</u><br><u>0.320</u><br><u>0.505</u>                                                         |
| Figure 3E                                          | RM Two-way ANOVA<br>Treatment<br>Day<br>Treatment x Day                                                                                                                               | F(3,21) = 56.70<br>F(3,677, 77.22) = 13.35<br>F(21,147) = 4.072                                                                                                                   | <u>p&lt;0.0001</u><br><u>p&lt;0.0001</u><br><u>p&lt;0.0001</u>                                                         | <u>0.825</u><br><u>0.389</u><br><u>0.675</u>                                                         |
| Figure 4A<br>pAMPK<br><br>tAMPK<br><br>pAMPK/tAMPK | Two-way ANOVA<br>Repeated Injection<br>Acute Injection<br>Interaction<br>Repeated Injection<br>Acute Injection<br>Interaction<br>Repeated Injection<br>Acute Injection<br>Interaction | F(1,37) = 0.5551<br>F(1,37) = 0.00116<br>F(1,37) = 0.2835<br>F(1,41) = 0.6737<br>F(1,41) = 0.2508<br>F(1,37) = 0.05196<br>F(1,37) = 1.130<br>F(1,37) = 6.580<br>F(1,37) = 0.01567 | p=0.4609<br>p=0.9730<br>p=0.5976<br>p=0.4165<br>p=0.6192<br>p=0.8208<br>p=0.2948<br><u>p=0.0145</u><br>p=0.9011        | 0.0148<br>0.0000313<br>0.0076<br>0.0162<br>0.00608<br>0.0013<br>0.0296<br><u>0.1508</u><br>0.000423  |
| Figure 4B<br>pAMPK<br><br>tAMPK<br><br>pAMPK/tAMPK | Two-way ANOVA<br>Repeated Injection<br>Acute Injection<br>Interaction<br>Repeated Injection<br>Acute Injection<br>Interaction<br>Repeated Injection<br>Acute Injection<br>Interaction | F(1,41) = 0.6871<br>F(1,41) = 1.690<br>F(1,41) = 5.070<br>F(1,29) = 3.140<br>F(1,29) = 1.285<br>F(1,29) = 0.5119<br>F(1,29) = 0.04568<br>F(1,29) = 1.702<br>F(1,29) = 0.2289      | p=0.4119<br>p=0.2009<br><u>p=0.0298</u><br><u>p=0.0869</u><br>p=0.2663<br>p=0.4800<br>p=0.8323<br>p=0.2023<br>p=0.6359 | 0.0165<br>0.0396<br><u>0.1100</u><br><u>0.0977</u><br>0.0424<br>0.0173<br>0.0016<br>0.0555<br>0.0078 |

|                                                    |                    |                      |                              |               |
|----------------------------------------------------|--------------------|----------------------|------------------------------|---------------|
| Figure 4C<br>pAMPK<br><br>tAMPK<br><br>pAMPK/tAMPK | Two-way ANOVA      |                      |                              |               |
|                                                    | Repeated Injection | $F(1,41) = 0.1575$   | $p=0.6935$                   | 0.0038        |
|                                                    | Acute Injection    | $F(1,41) = 3.509$    | <b><math>p=0.0682</math></b> | <b>0.0788</b> |
|                                                    | Interaction        | $F(1,41) = 0.4904$   | $p=0.4877$                   | 0.0118        |
|                                                    | Repeated Injection | $F(1,40) = 0.2308$   | $p=0.6336$                   | 0.0057        |
|                                                    | Acute Injection    | $F(1,40) = 0.3858$   | $p=0.5380$                   | 0.0096        |
|                                                    | Interaction        | $F(1,40) = 5.947$    | <u><math>p=0.0193</math></u> | <u>0.1294</u> |
|                                                    | Repeated Injection | $F(1,40) = 0.2036$   | $p=0.6543$                   | 0.0051        |
|                                                    | Acute Injection    | $F(1,40) = 2.357$    | $p=0.1326$                   | 0.0556        |
|                                                    | Interaction        | $F(1,40) = 5.106$    | <u><math>p=0.0294</math></u> | <u>0.1132</u> |
| Figure 4D<br>pAMPK<br><br>tAMPK<br><br>pAMPK/tAMPK | Two-way ANOVA      |                      |                              |               |
|                                                    | Repeated Injection | $F(1,41) = 0.9455$   | $p=0.3366$                   | 0.0225        |
|                                                    | Acute Injection    | $F(1,41) = 0.4618$   | $p=0.5006$                   | 0.0111        |
|                                                    | Interaction        | $F(1,41) = 0.002878$ | $p=0.9576$                   | 0.000070      |
|                                                    | Repeated Injection | $F(1,40) = 0.1673$   | $p=0.6847$                   | 0.0042        |
|                                                    | Acute Injection    | $F(1,40) = 1.382$    | $p=0.2467$                   | 0.0334        |
|                                                    | Interaction        | $F(1,40) = 1.097$    | $p=0.3012$                   | 0.0267        |
|                                                    | Repeated Injection | $F(1,39) = 2.160$    | $p=0.1497$                   | 0.0525        |
|                                                    | Acute Injection    | $F(1,39) = 0.05351$  | $p=0.8183$                   | 0.0014        |
|                                                    | Interaction        | $F(1,39) = 1.586$    | $p=0.2154$                   | 0.0391        |
| Figure 5A<br>pAMPK<br><br>tAMPK<br><br>pAMPK/tAMPK | Two-way ANOVA      |                      |                              |               |
|                                                    | Repeated Injection | $F(1,42) = 0.2089$   | $p=0.6500$                   | 0.0049        |
|                                                    | Acute Injection    | $F(1,42) = 5.780$    | <u><math>p=0.0207</math></u> | <u>0.0121</u> |
|                                                    | Interaction        | $F(1,42) = 0.2770$   | $p=0.6015$                   | 0.0066        |
|                                                    | Repeated Injection | $F(1,40) = 0.339$    | $p=0.5637$                   | 0.0084        |
|                                                    | Acute Injection    | $F(1,40) = 0.02257$  | $p=0.8813$                   | 0.00056       |
|                                                    | Interaction        | $F(1,40) = 0.3071$   | $p=0.5825$                   | 0.0076        |
|                                                    | Repeated Injection | $F(1,39) = 0.5589$   | $p=0.4592$                   | 0.0141        |
|                                                    | Acute Injection    | $F(1,39) = 0.2996$   | $p=0.5873$                   | 0.0076        |
|                                                    | Interaction        | $F(1,39) = 0.09976$  | $p=0.7538$                   | 0.0026        |
| Figure 5B<br>pAMPK<br><br>tAMPK<br><br>pAMPK/tAMPK | Two-way ANOVA      |                      |                              |               |
|                                                    | Repeated Injection | $F(1,42) = 0.2300$   | $p=0.6340$                   | 0.0054        |
|                                                    | Acute Injection    | $F(1,42) = 7.687$    | <u><math>p=0.0083</math></u> | <u>0.1545</u> |
|                                                    | Interaction        | $F(1,42) = 0.1776$   | $p=0.6756$                   | 0.0042        |
|                                                    | Repeated Injection | $F(1,35) = 1.804$    | $p=0.1879$                   | 0.049         |
|                                                    | Acute Injection    | $F(1,35) = 6.252$    | <u><math>p=0.0172</math></u> | <u>0.1515</u> |
|                                                    | Interaction        | $F(1,35) = 0.3359$   | $p=0.5659$                   | 0.0095        |
|                                                    | Repeated Injection | $F(1,34) = 0.9479$   | $p=0.3317$                   | 0.0271        |
|                                                    | Acute Injection    | $F(1,34) = 1.749$    | $p=0.1949$                   | 0.0489        |
|                                                    | Interaction        | $F(1,34) = 0.05753$  | $p=0.8119$                   | 0.0017        |
| Figure 5C<br>pAMPK                                 | Two-way ANOVA      |                      |                              |               |
|                                                    | Repeated Injection | $F(1,39) = 3.286$    | <b><math>p=0.0776</math></b> | <b>0.0777</b> |

|             |           |                     |                          |                                 |               |
|-------------|-----------|---------------------|--------------------------|---------------------------------|---------------|
| pAMPK/tAMPK | tAMPK     | Acute Injection     | $F(1,39) = 1.966$        | $p=0.1688$                      | 0.0479        |
|             |           | Interaction         | $F(1,39) = 1.241$        | $p=0.2722$                      | 0.0308        |
|             |           | Repeated Injection  | $F(1,39) = 2.788$        | $p=0.1030$                      | 0.0667        |
|             |           | Acute Injection     | $F(1,39) = 2.766$        | $p=0.1043$                      | 0.06620       |
|             |           | Interaction         | $F(1,39) = 3.604$        | <b><math>p=0.0681</math></b>    | <b>0.0846</b> |
|             |           | Repeated Injection  | $F(1,39) = 0.5414$       | $p=0.4663$                      | 0.0137        |
| pAMPK/tAMPK |           | Acute Injection     | $F(1,39) = 0.5094$       | $p=0.4769$                      | 0.0129        |
|             |           | Interaction         | $F(1,39) = 1.456$        | $p=0.2348$                      | 0.0360        |
| pAMPK/tAMPK | Figure 5D | Two-way ANOVA       |                          |                                 |               |
|             |           | Repeated Injection  | $F(1,42) = 1.904$        | $p=0.1749$                      | 0.0434        |
|             |           | Acute Injection     | $F(1,42) = 0.239$        | $p=0.6275$                      | 0.0057        |
|             |           | Interaction         | $F(1,42) = 1.021$        | $p=0.3182$                      | 0.0237        |
|             |           | Repeated Injection  | $F(1,36) = 0.5738$       | $p=0.4537$                      | 0.0157        |
|             |           | Acute Injection     | $F(1,36) = 0.4839$       | $p=0.4911$                      | 0.0133        |
| pAMPK/tAMPK |           | Interaction         | $F(1,36) = 0.07614$      | $p=0.7842$                      | 0.0021        |
|             |           | Repeated Injection  | $F(1,36) = 0.5156$       | $p=0.4774$                      | 0.0141        |
|             |           | Acute Injection     | $F(1,36) = 0.8092$       | $p=0.3743$                      | 0.0220        |
|             |           | Interaction         | $F(1,36) = 2.623$        | $p=0.1140$                      | 0.0678        |
| Figure 6B   |           | Mixed-effects ANOVA |                          |                                 |               |
|             |           | Treatment           | $F(2,16) = 13.50$        | <u><math>p&lt;0.0001</math></u> |               |
|             |           | Day                 | $F(3,263,51.80) = 19.92$ | <u><math>p=0.0004</math></u>    |               |
|             |           | Treatment x Day     | $F(16,127) = 8.989$      | <u><math>p&lt;0.0001</math></u> |               |
| Figure 6C   |           | Mixed-effects ANOVA |                          |                                 |               |
|             |           | Treatment           | $F(2,16) = 33.26$        | <u><math>p&lt;0.0001</math></u> |               |
|             |           | Day                 | $F(3,245,51.11) = 27.88$ | <u><math>p&lt;0.0001</math></u> |               |
|             |           | Treatment x Day     | $F(16,126) = 17.34$      | <u><math>p&lt;0.0001</math></u> |               |
| Figure 6D   |           | Two-way ANOVA       |                          |                                 |               |
|             |           | Treatment           | $F(1,22) = 12.52$        | <u><math>p=0.0007</math></u>    | <u>0.414</u>  |
|             |           | Sex                 | $F(1,22) = 4.346$        | <u><math>p=0.0489</math></u>    | <u>0.165</u>  |
|             |           | Treatment x Sex     | $F(1,22) = 0.3714$       | $p=0.5485$                      | 0.017         |
| Figure 6E   |           | Two-way ANOVA       |                          |                                 |               |
|             |           | Treatment           | $F(1,23) = 14.03$        | <u><math>p=0.0011</math></u>    | <u>0.3789</u> |
|             |           | Sex                 | $F(1,23) = 1.219$        | $p=0.2809$                      | 0.0503        |
|             |           | Treatment x Sex     | $F(1,23) = 0.9697$       | $p=0.9697$                      | 0.000064      |
| Figure 7A   |           | One-way ANOVA       |                          |                                 |               |
|             |           | pAMPK               | $F(2,35) = 0.1595$       | $p=0.8532$                      | 0.0090        |
|             |           | tAMPK               | $F(2,34) = 0.3029$       | $p=0.7403$                      | 0.0175        |
|             |           | pAMPK/tAMPK         | $F(2,34) = 0.1790$       | $p=0.1824$                      | 0.0953        |

|           |                                                |                                                         |                                  |                            |
|-----------|------------------------------------------------|---------------------------------------------------------|----------------------------------|----------------------------|
| Figure 7B | One-way ANOVA<br>pAMPK<br>tAMPK<br>pAMPK/tAMPK | F(2,34) = 0.1923<br>F(2,34) = 1.337<br>F(2,34) = 0.9907 | p=0.8260<br>p=0.2762<br>p=0.3818 | 0.0112<br>0.0729<br>0.0551 |
| Figure 7C | One-way ANOVA<br>pAMPK<br>tAMPK<br>pAMPK/tAMPK | F(2,35) = 0.2295<br>F(2,35) = 1.121<br>F(2,35) = 0.7364 | p=0.7961<br>p=0.3373<br>p=0.4861 | 0.0129<br>0.0602<br>0.0404 |

|           |                                                                                                                                                                     |                                                                                                                                                                             |                                                                                                                               |                                                                                                               |
|-----------|---------------------------------------------------------------------------------------------------------------------------------------------------------------------|-----------------------------------------------------------------------------------------------------------------------------------------------------------------------------|-------------------------------------------------------------------------------------------------------------------------------|---------------------------------------------------------------------------------------------------------------|
| Figure 7D | One-way ANOVA<br>pAMPK<br>tAMPK<br>pAMPK/tAMPK                                                                                                                      | F(2,35) = 0.3209<br>F(2,35) = 0.2616<br>F(2,35) = 0.1448                                                                                                                    | p=0.7276<br>p=0.7713<br>p=0.8657                                                                                              | 0.0180<br>0.0147<br>0.0082                                                                                    |
| Figure 8A | One-way ANOVA<br>pAMPK<br>tAMPK<br>pAMPK/tAMPK                                                                                                                      | F(2,28) = 0.6681<br>F(2,30) = 1.485<br>F(2,28) = 0.9776                                                                                                                     | p=0.5207<br>p=0.2427<br>p=0.3887                                                                                              | 0.0455<br>0.0901<br>0.0653                                                                                    |
| Figure 8B | One-way ANOVA<br>pAMPK<br>tAMPK<br>pAMPK/tAMPK                                                                                                                      | F(2,33) = 0.3278<br>F(2,33) = 3.373<br>F(2,33) = 0.4295                                                                                                                     | p=0.7228<br><u>p=0.0465</u><br>p=0.6544                                                                                       | 0.0195<br><u>0.1697</u><br>0.0254                                                                             |
| Figure 8C | One-way ANOVA<br>pAMPK<br>tAMPK<br>pAMPK/tAMPK                                                                                                                      | F(2,31) = 3.353<br>F(2,32) = 2.456<br>F(2,31) = 0.1661                                                                                                                      | <u>p=0.0481</u><br>p=0.1018<br>p=0.8477                                                                                       | <u>0.1778</u><br>0.1331<br>0.0106                                                                             |
| Figure 8D | One-way ANOVA<br>pAMPK<br>tAMPK<br>pAMPK/tAMPK                                                                                                                      | F(2,35) = 1.295<br>F(2,35) = 1.738<br>F(2,34) = 0.9889                                                                                                                      | p=0.2868<br>p=0.1907<br>p=0.3827                                                                                              | 0.0689<br>0.0904<br>0.0549                                                                                    |
| Figure 9A | Two-way ANOVA<br>pAMPK<br>Treatment<br>Sex<br>Treatment x Sex<br>tAMPK<br>Treatment<br>Sex<br>Treatment x Sex<br>pAMPK/tAMPK<br>Treatment<br>Sex<br>Treatment x Sex | F(2,32) = 0.1577<br>F(1,32) = 0.04786<br>F(2,32) = 1.269<br>F(2,31) = 0.2182<br>F(1,31) = 8.214<br>F(2,31) = 3.228<br>F(2,30) = 1.569<br>F(1,30) = 5.389<br>F(2,30) = 1.266 | p=0.8547<br>p=0.8282<br>p=0.2947<br>p=0.8052<br><u>p=0.0074</u><br><b>p=0.0533</b><br>p=0.2248<br><u>p=0.0272</u><br>p=0.2965 | 0.00976<br>0.00149<br>0.0735<br>0.0139<br><u>0.2094</u><br><b>0.1723</b><br>0.0947<br><u>0.1523</u><br>0.0779 |

|                                                     |                 |                     |                              |               |
|-----------------------------------------------------|-----------------|---------------------|------------------------------|---------------|
| Figure 9B<br>pAMPK<br><br>tAMPK<br><br>pAMPK/tAMPK  | Two-way ANOVA   |                     |                              |               |
|                                                     | Treatment       | $F(2,31) = 0.06162$ | $p=0.9404$                   | 0.00396       |
|                                                     | Sex             | $F(1,31) = 2.561$   | $p=0.1196$                   | 0.0763        |
|                                                     | Treatment x Sex | $F(2,31) = 1.681$   | $p=0.2027$                   | 0.0979        |
|                                                     | Treatment       | $F(2,31) = 1.317$   | $p=0.2825$                   | 0.0783        |
|                                                     | Sex             | $F(1,31) = 0.1926$  | $p=0.6648$                   | 0.0062        |
|                                                     | Treatment x Sex | $F(2,31) = 1.018$   | $p=0.3732$                   | 0.0616        |
|                                                     | Treatment       | $F(2,31) = 1.003$   | $p=0.3784$                   | 0.0608        |
|                                                     | Sex             | $F(1,31) = 1.889$   | $p=0.1792$                   | 0.0574        |
|                                                     | Treatment x Sex | $F(2,31) = 0.5864$  | $p=0.5624$                   | 0.0364        |
| Figure 9C<br>pAMPK<br><br>tAMPK<br><br>pAMPK/tAMPK  | Two-way ANOVA   |                     |                              |               |
|                                                     | Treatment       | $F(2,32) = 0.2176$  | $p=0.8056$                   | 0.0134        |
|                                                     | Sex             | $F(1,32) = 0.3811$  | $p=0.5414$                   | 0.0118        |
|                                                     | Treatment x Sex | $F(2,32) = 0.3608$  | $p=0.6999$                   | 0.0221        |
|                                                     | Treatment       | $F(2,32) = 1.141$   | $p=0.3322$                   | 0.0666        |
|                                                     | Sex             | $F(1,32) = 0.4297$  | $p=0.5168$                   | 0.0132        |
|                                                     | Treatment x Sex | $F(2,32) = 1.602$   | $p=0.2172$                   | 0.0910        |
|                                                     | Treatment       | $F(2,32) = 0.793$   | $p=0.4612$                   | 0.0472        |
|                                                     | Sex             | $F(1,32) = 1.245$   | $p=0.2728$                   | 0.0374        |
|                                                     | Treatment x Sex | $F(2,32) = 2.157$   | $p=0.1322$                   | 0.1188        |
| Figure 9D<br>pAMPK<br><br>tAMPK<br><br>pAMPK/tAMPK  | Two-way ANOVA   |                     |                              |               |
|                                                     | Treatment       | $F(2,32) = 0.3444$  | $p=0.7112$                   | 0.0211        |
|                                                     | Sex             | $F(1,32) = 0.07341$ | $p=0.7882$                   | 0.0023        |
|                                                     | Treatment x Sex | $F(2,32) = 2.776$   | <b><math>p=0.0773</math></b> | <b>0.1478</b> |
|                                                     | Treatment       | $F(2,32) = 0.321$   | $p=0.7277$                   | 0.0197        |
|                                                     | Sex             | $F(1,32) = 3.241$   | <b><math>p=0.0813</math></b> | <b>0.0920</b> |
|                                                     | Treatment x Sex | $F(2,32) = 4.096$   | <u><math>p=0.0261</math></u> | <u>0.2038</u> |
|                                                     | Treatment       | $F(2,32) = 0.1382$  | $p=0.8714$                   | 0.0086        |
|                                                     | Sex             | $F(1,32) = 0.5035$  | $p=0.4831$                   | 0.0155        |
|                                                     | Treatment x Sex | $F(2,32) = 0.4055$  | $p=0.6700$                   | 0.0247        |
| Figure 10A<br>pAMPK<br><br>tAMPK<br><br>pAMPK/tAMPK | Two-way ANOVA   |                     |                              |               |
|                                                     | Treatment       | $F(2,25) = 0.4995$  | $p=0.6127$                   | 0.0384        |
|                                                     | Sex             | $F(1,25) = 0.9859$  | $p=0.3303$                   | 0.0379        |
|                                                     | Treatment x Sex | $F(2,25) = 0.6118$  | $p=0.5503$                   | 0.0466        |
|                                                     | Treatment       | $F(2,27) = 1.165$   | $p=0.3270$                   | 0.0794        |
|                                                     | Sex             | $F(1,27) = 4.874$   | <u><math>p=0.0359</math></u> | <u>0.1529</u> |
|                                                     | Treatment x Sex | $F(2,27) = 0.695$   | $p=0.5078$                   | 0.0489        |
|                                                     | Treatment       | $F(2,25) = 0.0852$  | $p=0.4386$                   | 0.0638        |
|                                                     | Sex             | $F(1,25) = 2.856$   | $p=0.1034$                   | 0.1025        |
|                                                     | Treatment x Sex | $F(2,25) = 0.00245$ | $p=0.9976$                   | 0.0002        |
| Figure 10B<br>pAMPK                                 | Two-way ANOVA   |                     |                              |               |
|                                                     | Treatment       | $F(2,30) = 0.3171$  | $p=0.7303$                   | 0.0207        |

|             |            |                 |                   |                 |               |
|-------------|------------|-----------------|-------------------|-----------------|---------------|
| pAMPK/tAMPK | tAMPK      | Sex             | F(1,30) = 1.184   | p=0.2853        | 0.0380        |
|             |            | Treatment x Sex | F(2,30) = 0.4754  | p=0.6263        | 0.0307        |
|             |            | Treatment       | F(2,30) = 3.236   | <b>p=0.0534</b> | <b>0.1775</b> |
|             |            | Sex             | F(1,30) = 0.9416  | p=0.3396        | 0.0304        |
|             |            | Treatment x Sex | F(2,30) = 0.4460  | p=0.6443        | 0.0289        |
|             |            | Treatment       | F(2,30) = 0.4034  | p=0.6716        | 0.0262        |
|             |            | Sex             | F(1,30) = 0.4794  | p=0.4940        | 0.0157        |
|             |            | Treatment x Sex | F(2,30) = 0.2953  | p=0.7465        | 0.0193        |
| pAMPK/tAMPK | Figure 10C | Two-way ANOVA   |                   |                 |               |
|             | pAMPK      | Treatment       | F(2,28) = 3.298   | <b>p=0.0517</b> | <b>0.1906</b> |
|             |            | Sex             | F(1,28) = 0.3147  | p=0.5793        | 0.0111        |
|             |            | Treatment x Sex | F(2,28) = 0.2950  | p=0.7468        | 0.0206        |
|             | tAMPK      | Treatment       | F(2,29) = 2.287   | p=0.1196        | 0.1362        |
|             |            | Sex             | F(1,29) =         | p=0.9828        | 0.000016      |
|             |            | Treatment x Sex | 0.0004716         | p=0.6359        | 0.0307        |
|             |            | Treatment       | F(2,29) = 0.4599  | p=0.5765        | 0.0386        |
| pAMPK/tAMPK |            | Sex             | F(2,28) = 0.5618  | p=0.6349        | 0.0082        |
|             |            | Treatment x Sex | F(1,28) = 0.2304  | p=0.9236        | 0.0057        |
|             |            |                 | F(2,28) = 0.07974 |                 |               |
|             | Figure 10D | Two-way ANOVA   |                   |                 |               |
|             | pAMPK      | Treatment       | F(2,32) = 1.231   | p=0.3056        | 0.0714        |
|             |            | Sex             | F(1,32) = 1.210   | p=0.2796        | 0.0364        |
|             |            | Treatment x Sex | F(2,32) = 0.02928 | p=0.9712        | 0.0018        |
|             | tAMPK      | Treatment       | F(2,32) = 1.754   | p=0.1894        | 0.0988        |
| pAMPK/tAMPK |            | Sex             | F(1,32) = 1.598   | p=0.2153        | 0.0476        |
|             |            | Treatment x Sex | F(2,32) = 0.9478  | p=0.3982        | 0.0559        |
|             |            | Treatment       | F(2,31) = 1.077   | p=0.3530        | 0.0650        |
|             |            | Sex             | F(1,31) = 2.941   | p=0.0963        | 0.0866        |
|             |            | Treatment x Sex | F(2,32) = 2.006   | p=0.1517        | 0.1145        |

Footnote: Significant effects as demonstrated by  $p < 0.05$  are indicated by underlining whereas trend-level results with  $p > 0.05$  but  $p < 0.10$  are indicated by bolding.
