# Supplementary material for: Metformin Prevents Cocaine Sensitization: Involvement of AMPK Trafficking between Subcellular Compartments in the Corticostriatal Reward Circuit
Source: Preprints.org preprint supplement (doi:10.20944/preprints202310.1746.v1), 2023-10-26
Supplement: Supplementary file 3 [file supplementary]

Archive with 2 entries (2 files):
- Supplement_AMPK.pdf
- __MACOSX/._Supplement_AMPK.pdf
